# Supplementary material
Source: PubMed Central journal article supplement (PMC11586852)
Supplement: NIHMS2034197-supplement-Online-Only_Data_Supplement.pdf [file NIHMS2034197-supplement-Online-Only_Data_Supplement.pdf]

## Supplement Material

| Time (hr) | % of parent remaining after serum incubation |        |        |
|-----------|----------------------------------------------|--------|--------|
|           | Human                                        | Rat    | Monkey |
| 0         | 100.0%                                       | 100.0% | 100.0% |
| 2         | 99.6%                                        | 99.4%  | 99.7%  |
| 8         | 96.0%                                        | 96.4%  | 100.0% |
| 24        | 98.8%                                        | 89.0%  | 99.6%  |
| 48        | 97.9%                                        | 87.8%  | 99.9%  |
| 72        | 99.2%                                        | 86.5%  | 99.5%  |

**Table I (Supplemental file). Percentage of ARC15105 remaining in nuclease rich serum of different species.**

|                                                                                          | <b>Patients with AMI</b> | <b>Controls</b>  | <b>P</b> |
|------------------------------------------------------------------------------------------|--------------------------|------------------|----------|
| Subgroups n (%)                                                                          |                          |                  |          |
| Acute myocardial infarction                                                              | 21 (100)                 |                  |          |
| ST-elevation myocardial infarction                                                       | 8 (38)                   |                  |          |
| non ST-elevation myocardial infarction                                                   | 13 (62)                  |                  |          |
| Volunteers                                                                               |                          | 21 (100)         |          |
| Young                                                                                    |                          | 9 (43)           |          |
| age-matched                                                                              |                          | 12 (57)          |          |
| Male sex n (%)                                                                           | 17 (81)                  | 10 (48)          | 0.024    |
| Medical history n (%)                                                                    |                          |                  |          |
| Diabetes mellitus                                                                        | 5 (24)                   | 0 (0)            | 0.017    |
| Hypertension                                                                             | 16 (76)                  | 3 (14)           | <0.001   |
| Hyperlipidemia                                                                           | 10 (48)                  | 1 (5)            | 0.002    |
| previous AMI                                                                             | 5 (24)                   | 0 (0)            | 0.017    |
| current smoker                                                                           | 6 (29)                   | 1 (5)            | 0.038    |
| Medical therapy at the time of blood sampling n (%)                                      |                          |                  |          |
| angiotensin converting enzyme (ACE) inhibitors or angiotensin II receptor blockers (ARB) | 17 (81)                  | 0 (0)            | <0.001   |
| Aspirin                                                                                  | 21 (100)                 | 0 (0)            | <0.001   |
| Clopidogrel                                                                              | 21 (100)                 | 0 (0)            | <0.001   |
| β-Blockers                                                                               | 15 (71)                  | 0 (0)            | <0.001   |
| Heparins                                                                                 | 21 (100)                 | 0 (0)            | <0.001   |
| Calcium channel blockers (CCB)                                                           | 3 (14)                   | 0 (0)            | 0.072    |
| Proton pump inhibitors                                                                   | 14 (67)                  | 0 (0)            | <0.001   |
| Statins                                                                                  | 16 (76)                  | 0 (0)            | <0.001   |
| Anti-diabetics                                                                           | 2 (10)                   | 0 (0)            | 0.147    |
| Percutaneous coronary intervention (PCI) prior to blood drawing n (%)                    | 16 (76)                  | NA               | NA       |
| Age: median (IQR)                                                                        | 65 (57-80)               | 45 (26-61)       | 0.123    |
| Body mass index (BMI), kg/m <sup>2</sup> : median (IQR)                                  | 26 (23-30)               | 23 (22-26)       | 0.217    |
| Mean arterial pressure (MAP; mmHg): median (IQR)                                         | 102 (806-105)            | 100 (92-103)     | 0.206    |
| platelet count x 10 <sup>3</sup> /uL: median (IQR)                                       | 176 (154-205)            | 172 (162-227)    | 0.537    |
| haemoglobin g/dl: median (IQR)                                                           | 8.0 (7.0-10.6)           | 5.4 (4.1-6.0)    | 0.758    |
| leukocyte count x 10 <sup>3</sup> /uL: median (IQR)                                      | 12.6 (11.5-13.3)         | 13.0 (12.5-13.5) | <0.001   |

**Table II (Supplemental file). Demographics of study participants.** IQR=interquartile range; NA=not applicable.

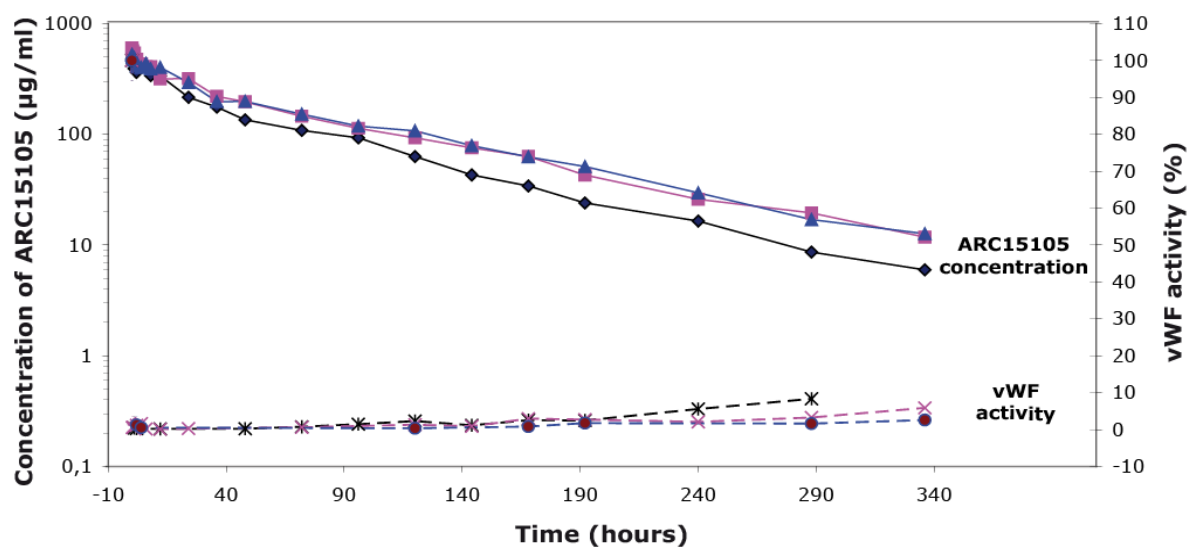

**Figure I (Supplemental file).** Inhibition of von Willebrand Factor (VWF) in three cynomolgus monkeys after SC injection of 20mg/kg ARC15105.
